# Supplementary material
Source: PubMed Central journal article supplement (PMC3589308)
Supplement: supp_121265_glucose-haidar-3-at.pdf [file supp_121265_glucose-haidar-3-at.pdf]

## Appendix 3 (as supplied by the authors): Supplementary Figures and Tables.

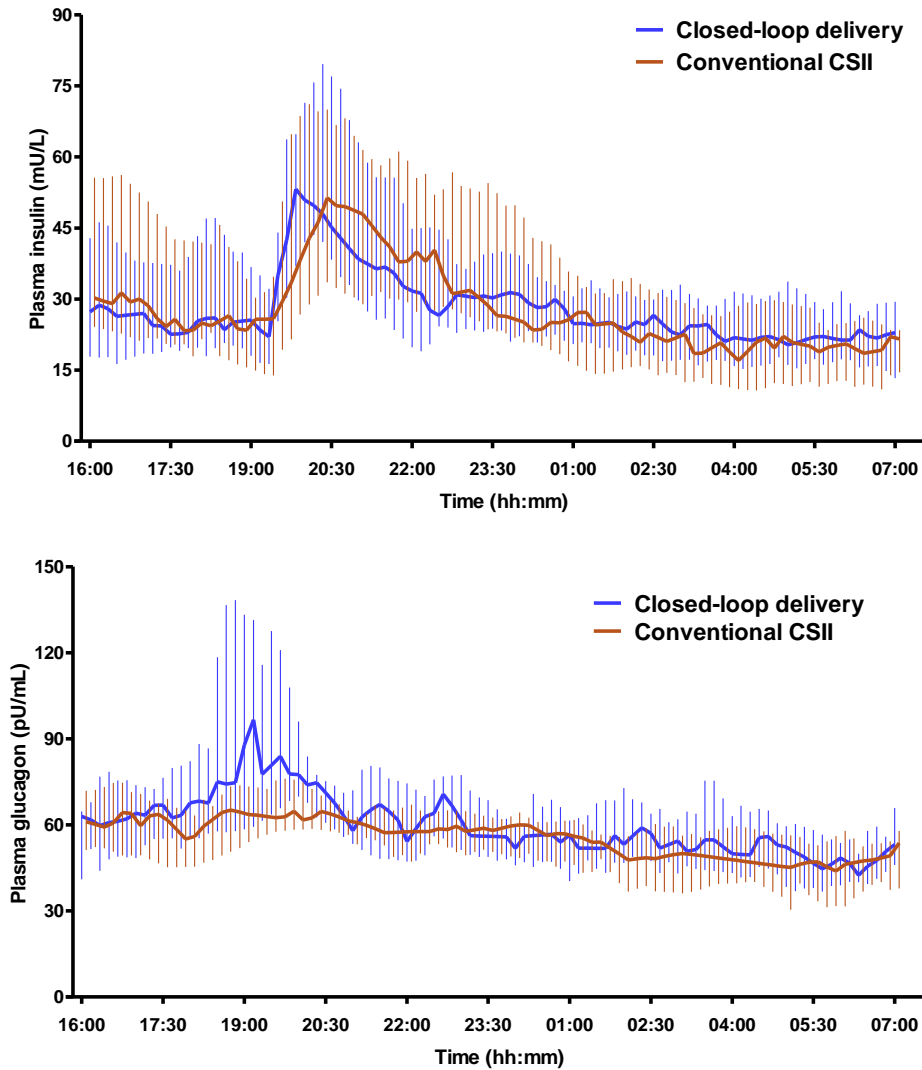

**Supplement Figure 1. Profiles (medians and interquartile ranges) of plasma insulin (top panel) and plasma glucagon concentrations (bottom panel). CSII = continuous subcutaneous insulin infusion.**

**Supplement Table 1. Baseline characteristics of study participants (n = 15, female/male = 9/6).**

| <b>Characteristic</b>                | <b>Mean ± SD</b> |
|--------------------------------------|------------------|
| Age (years)                          | 47.1 ± 12.3      |
| Weight (kg)                          | 74.2 ± 16.9      |
| Body mass index (kg/m <sup>2</sup> ) | 25.9 ± 4.6       |
| HbA1c                                | 7.9 ± 0.7        |
| Duration of diabetes (years)         | 26.5 ± 14.8      |
| Total daily insulin dose (U/kg)      | 0.57 ± 0.12      |

**Supplement Table 2. Characteristics of glucagon delivery. Results are median (IQR) or mean  $\pm$  SD as appropriate.**

| <b>Characteristic</b>                                                   | <b>Overall study period</b> | <b>Night period*</b>   |
|-------------------------------------------------------------------------|-----------------------------|------------------------|
| Total glucagon delivery (mg)                                            | 0.076 (0.016 to 0.17)       | 0.009 (0.0 to 0.054)   |
| Number of boluses per experiment (unitless)                             | 4 $\pm$ 3                   | 1.6 $\pm$ 2.2          |
| Size of bolus (mg)                                                      | 0.014 (0.013 to 0.036)      | 0.014 (0.011 to 0.028) |
| Time since last insulin delivery (min)                                  | 40 $\pm$ 35                 | 57 $\pm$ 42            |
| Glucose level at the time of bolus delivery (mmol/l)                    | 4.9 (4.2 to 6.0)            | 5.0 (4.6 to 5.8)       |
| Glucose rate of change at the time of bolus delivery (mmol/l per hour)  | -0.8 (-2.0 to 0.3)          | -0.5 (-1.8 to 0.1)     |
| Glucose level 20 minutes post bolus delivery (mmol/l)                   | 5.3 (4.6 to 6.3)            | 5.2 (4.6 to 5.9)       |
| Glucose rate of change 20 minutes post bolus delivery (mmol/l per hour) | 1.8 (0.3 to 2.6)            | 0.6 (-0.1 to 2.0)      |

\* Between 23h00 and 7h00.
